# Supplementary material
Source: MDPI journal article supplement (https://www.mdpi.com/2073-4344/7/6/189)
Supplement: s1 [file s1]

# Supplementary Materials: Co<sub>3</sub>O<sub>4</sub> Nanoparticle-Decorated N-Doped Mesoporous Carbon Nanofibers as an Efficient Catalyst for Oxygen Reduction Reaction

Hairong Xue, Tao Wang, Hao Gong, Hu Guo, Xiaoli Fan, Li Song, Wei Xia, Yaya Feng and Jianping He

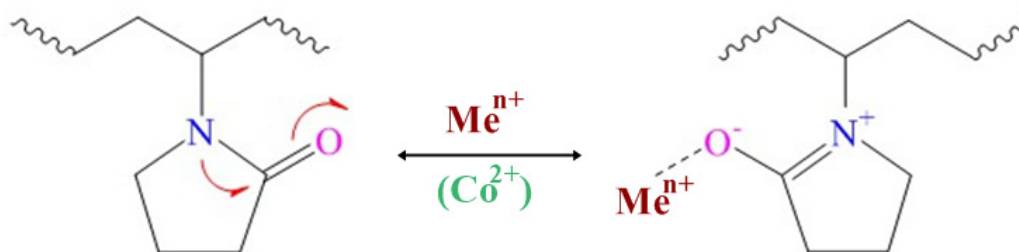

Figure S1. The scheme shows the resonance structure of PVP with metal cations.

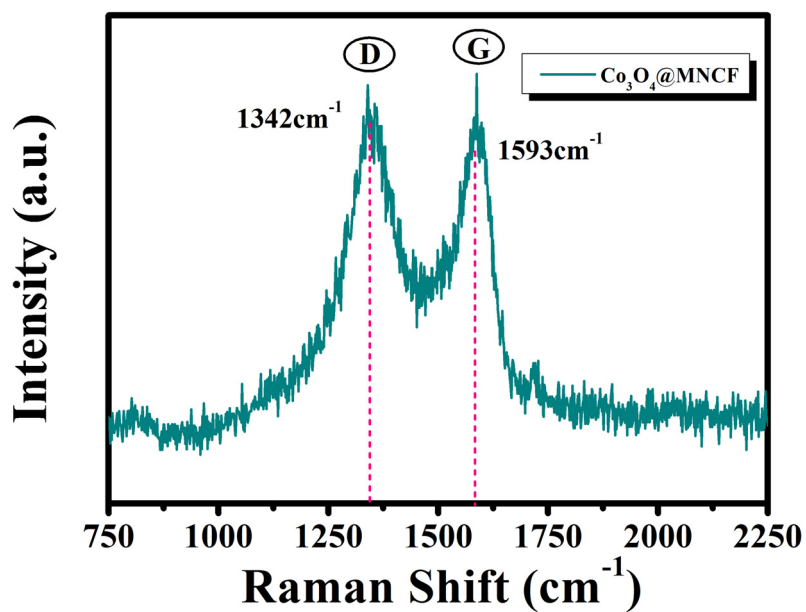

Figure S2. Raman spectroscopy of Co<sub>3</sub>O<sub>4</sub>@NMCF composite.

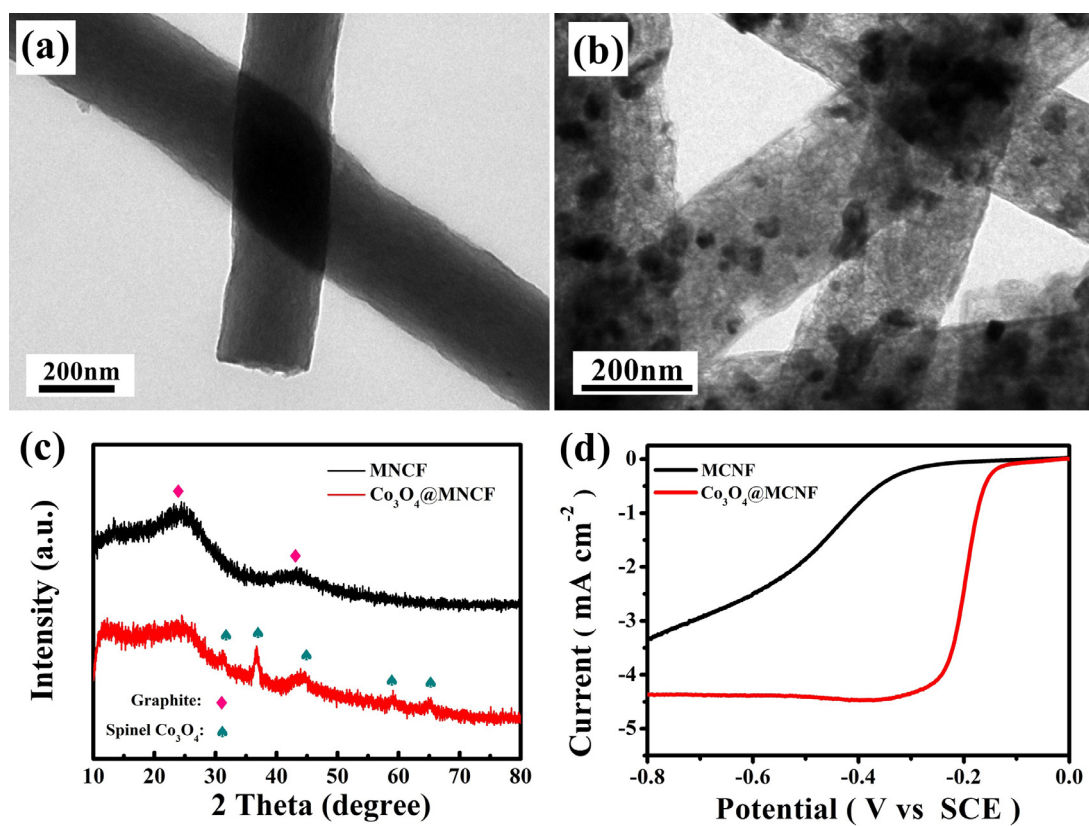

**Figure S3.** TEM images of the MNCF (a) and Co<sub>3</sub>O<sub>4</sub>@MNCF (b) samples; (c) Wide-angle XRD patterns, (d) LSV polarization curves of the MNCF and Co<sub>3</sub>O<sub>4</sub>@MNCF samples in O<sub>2</sub>-saturated 0.1 M KOH solution; For the electrochemical experiments, the potential scan rate was 5 mV s<sup>-1</sup> with 1600 rpm.
